# Supplementary material for: Dietary Patterns and Cognitive Function among Older Community-Dwelling Adults
Source: PubMed Central journal article supplement (PMC6116163; doi:10.3390/nu10081088), 2018-08-14
Supplement: nutrients-10-01088-s001.pdf [file nutrients-10-01088-s001.pdf]

**Table S1.** Baseline (1988–1992) characteristics of participants according to sex-specific tertile of diet score/factor (*n* = 1,499).

|                                     | Female | Mean age | Some college | Married | Current smoker | Exercise $\geq 3x$ /wk | Alcohol daily | Hypertension | Diabetes | Fair/poor health <sup>a</sup> | Energy intake | BMI               |            |
|-------------------------------------|--------|----------|--------------|---------|----------------|------------------------|---------------|--------------|----------|-------------------------------|---------------|-------------------|------------|
|                                     | n      | %        | Years (SD)   | %       | %              | %                      | %             | %            | %        | %                             | kcal/d        | kg/m <sup>2</sup> |            |
| <b>aMed diet score</b>              |        |          |              |         |                |                        |               |              |          |                               |               |                   |            |
| tertile 1                           | 525    | 59.4     | 72.7 (9.2)   | 65.1    | 74.3           | 12.2                   | 62.0          | 37.2         | 57.9     | 12.0                          | 5.0           | 1448 (473)        | 25.5 (4.0) |
| tertile 2                           | 576    | 57.3     | 73.5 (9.6)   | 71.9    | 74.3           | 8.7                    | 71.7          | 35.4         | 63.4     | 14.5                          | 3.3           | 1667 (504)        | 25.2 (4.0) |
| tertile 3                           | 398    | 58.3     | 73.6 (8.6)   | 71.6    | 75.1           | 5.3                    | 80.1          | 38.9         | 60.0     | 11.5                          | 3.5           | 1868 (523)        | 24.8 (3.4) |
| p-value                             |        | 0.77     | 0.22         | 0.03    | 0.95           | <0.001                 | <0.001        | 0.53         | 0.17     | 0.31                          | 0.33          | <0.001            | 0.02       |
| <b>AHEI-2010 score</b>              |        |          |              |         |                |                        |               |              |          |                               |               |                   |            |
| tertile 1                           | 498    | 57.4     | 73.1 (9.4)   | 65.1    | 73.3           | 13.3                   | 61.2          | 35.9         | 58.9     | 11.3                          | 5.2           | 1674 (524)        | 25.3 (4.0) |
| tertile 2                           | 507    | 59.0     | 73.6 (9.0)   | 71.2    | 75.0           | 9.3                    | 73.6          | 37.4         | 63.9     | 13.4                          | 3.2           | 1613 (519)        | 25.3 (4.1) |
| tertile 3                           | 494    | 58.5     | 73.0 (9.1)   | 72.1    | 75.3           | 4.5                    | 76.8          | 37.7         | 58.9     | 13.7                          | 3.4           | 1645 (530)        | 24.9 (3.4) |
| p-value                             |        | 0.88     | 0.51         | 0.03    | 0.74           | <0.001                 | <0.001        | 0.84         | 0.18     | 0.47                          | 0.19          | 0.19              | 0.18       |
| <b>Fortified cereals factor</b>     |        |          |              |         |                |                        |               |              |          |                               |               |                   |            |
| tertile 1                           | 495    | 58.8     | 73.3 (9.4)   | 68.7    | 74.7           | 9.9                    | 68.9          | 38.5         | 61.9     | 11.8                          | 5.1           | 1609 (647)        | 25.0 (3.6) |
| tertile 2                           | 503    | 58.1     | 72.7 (9.3)   | 67.4    | 76.1           | 8.7                    | 73.1          | 35.6         | 58.9     | 12.1                          | 4.4           | 1674 (445)        | 25.2 (4.0) |
| tertile 3                           | 501    | 58.1     | 73.7 (8.9)   | 72.3    | 72.7           | 8.4                    | 69.5          | 36.9         | 60.8     | 14.3                          | 2.4           | 1649 (458)        | 25.3 (3.9) |
| p-value                             |        | 0.97     | 0.25         | 0.22    | 0.44           | 0.68                   | 0.29          | 0.64         | 0.62     | 0.43                          | 0.08          | 0.14              | 0.75       |
| <b>Fruits and vegetables factor</b> |        |          |              |         |                |                        |               |              |          |                               |               |                   |            |
| tertile 1                           | 498    | 58.4     | 72.5 (9.2)   | 64.9    | 74.9           | 14.3                   | 62.2          | 39.6         | 57.2     | 13.1                          | 4.4           | 1609 (547)        | 25.2 (4.0) |
| tertile 2                           | 502    | 58.4     | 73.1 (9.1)   | 72.3    | 75.3           | 7.8                    | 71.7          | 37.1         | 62.8     | 12.3                          | 4.0           | 1681 (536)        | 25.3 (3.9) |
| tertile 3                           | 499    | 58.1     | 74.1 (9.1)   | 71.1    | 73.3           | 5.0                    | 77.6          | 34.3         | 61.6     | 12.6                          | 3.4           | 1641 (487)        | 25.2 (3.7) |
| p-value                             |        | 0.99     | 0.02         | 0.02    | 0.76           | <0.001                 | <0.001        | 0.21         | 0.16     | 0.92                          | 0.71          | 0.09              | 0.90       |
| <b>Animal fat/ vit B12 factor</b>   |        |          |              |         |                |                        |               |              |          |                               |               |                   |            |
| tertile 1                           | 496    | 58.7     | 74.0 (9.0)   | 65.9    | 73.2           | 8.7                    | 69.2          | 32.3         | 59.4     | 13.1                          | 4.8           | 1592 (600)        | 24.6 (3.5) |
| tertile 2                           | 500    | 57.8     | 72.9 (9.2)   | 72.2    | 74.6           | 10.2                   | 71.5          | 37.6         | 59.6     | 12.4                          | 3.0           | 1681 (524)        | 25.2 (3.8) |
| tertile 3                           | 503    | 58.4     | 72.8 (9.3)   | 70.2    | 75.7           | 8.2                    | 70.9          | 41.0         | 62.5     | 12.5                          | 4.0           | 1658 (434)        | 25.8 (4.1) |
| p-value                             |        | 0.96     | 0.07         | 0.09    | 0.65           | 0.5                    | 0.7           | 0.02         | 0.52     | 0.93                          | 0.33          | 0.02              | <0.001     |
| <b>Dairy factor</b>                 |        |          |              |         |                |                        |               |              |          |                               |               |                   |            |
| tertile 1                           | 500    | 58.2     | 72.8 (9.0)   | 67.6    | 77.2           | 11.0                   | 68.9          | 40.4         | 63.2     | 10.8                          | 3.4           | 1561 (569)        | 25.3 (3.7) |
| tertile 2                           | 502    | 58.4     | 73.9 (9.6)   | 66.9    | 73.5           | 7.2                    | 71.2          | 35.5         | 57.8     | 13                            | 4.2           | 1726 (525)        | 25.3 (3.9) |
| tertile 3                           | 497    | 58.4     | 73.0 (8.9)   | 73.8    | 72.8           | 8.9                    | 71.5          | 35.1         | 60.5     | 14.4                          | 4.2           | 1644 (462)        | 25.0 (4.0) |
| p-value                             |        | 0.99     | 0.15         | 0.03    | 0.23           | 0.11                   | 0.63          | 0.15         | 0.21     | 0.22                          | 0.75          | <0.001            | 0.46       |
| <b>Plant PUFA/ vit E factor</b>     |        |          |              |         |                |                        |               |              |          |                               |               |                   |            |
| tertile 1                           | 496    | 58.3     | 73.6 (8.9)   | 67.7    | 72.0           | 7.9                    | 68.8          | 30.8         | 63.1     | 13.0                          | 3.8           | 1580 (622)        | 25.2 (3.9) |
| tertile 2                           | 500    | 58.4     | 72.9 (9.4)   | 69.4    | 76.6           | 9.8                    | 73.6          | 39.7         | 60.0     | 10.9                          | 4.2           | 1701 (503)        | 25.4 (4.1) |
| tertile 3                           | 503    | 58.3     | 73.2 (9.2)   | 71.2    | 75.0           | 9.3                    | 69.2          | 40.4         | 58.6     | 15.6                          | 3.8           | 1650 (425)        | 24.9 (3.6) |
| p-value                             |        | 0.99     | 0.50         | 0.5     | 0.24           | 0.54                   | 0.17          | <0.001       | 0.33     | 0.07                          | 0.93          | <0.001            | 0.15       |
| <b>Sugar/ low protein factor</b>    |        |          |              |         |                |                        |               |              |          |                               |               |                   |            |
| tertile 1                           | 498    | 58.2     | 70.8 (8.5)   | 74.3    | 78.1           | 10.8                   | 71.9          | 43.6         | 58.6     | 15.4                          | 3.0           | 1618 (580)        | 25.3 (3.8) |
| tertile 2                           | 498    | 58.2     | 73.5 (9.2)   | 69.5    | 74.1           | 9                      | 69.9          | 33.1         | 61.4     | 12.0                          | 3.8           | 1617 (515)        | 25.4 (4.0) |
| tertile 3                           | 503    | 58.4     | 75.4 (9.3)   | 64.6    | 71.4           | 7.2                    | 69.9          | 34.3         | 61.6     | 10.6                          | 5.0           | 1696 (471)        | 24.9 (3.7) |
| p-value                             |        | 0.99     | <0.001       | <0.001  | 0.048          | 0.13                   | 0.73          | <0.001       | 0.54     | 0.07                          | 0.28          | 0.02              | 0.06       |

All values are shown as % or mean (SD).

P-value for differences based on ANOVA for continuous data and  $\chi^2$  or Fisher's exact test for categorical data.

<sup>a</sup>Self-perceived health

aMed=alternate Mediterranean diet score, AHEI=alternate healthy eating index; Vit=vitamin;

PUFA=polyunsaturated fatty acid

**Table S2.** Parameter estimates and 95% confidence intervals from the longitudinal mixed-effects analyses of tertile of dietary pattern with cognitive function, with the lowest tertile as the reference level.

|                                   | MMSE                    |              |                         |               | Trails B                |                |                         |               | Verbal Fluency          |              |                         |              | Buschke Total Recall    |               |                         |               |
|-----------------------------------|-------------------------|--------------|-------------------------|---------------|-------------------------|----------------|-------------------------|---------------|-------------------------|--------------|-------------------------|--------------|-------------------------|---------------|-------------------------|---------------|
|                                   | Base Model <sup>a</sup> |              | Full Model <sup>b</sup> |               | Base Model <sup>a</sup> |                | Full Model <sup>b</sup> |               | Base Model <sup>a</sup> |              | Full Model <sup>b</sup> |              | Base Model <sup>a</sup> |               | Full Model <sup>b</sup> |               |
|                                   | Beta                    | 95%CI        | Beta                    | 95%CI         | Beta                    | 95%CI          | Beta                    | 95%CI         | Beta                    | 95%CI        | Beta                    | 95%CI        | Beta                    | 95%CI         | Beta                    | 95%CI         |
| <b>aMed score</b>                 |                         |              |                         |               |                         |                |                         |               |                         |              |                         |              |                         |               |                         |               |
| tertile 2                         | 0.22                    | (0.03, 0.41) | 0.19                    | (-0.006,0.38) | -6.10                   | (-7.85,-0.89)  | -4.92                   | (-10.08,0.25) | 0.31                    | (-0.12,0.75) | 0.22                    | (-0.18,0.62) | 0.98                    | (0.10,1.90)   | 0.87                    | (-0.01,1.75)  |
| tertile 3                         | 0.39                    | (0.17,0.60)  | 0.33                    | (0.11,0.55)   | -5.28                   | (-11.11,0.55)  | -2.77                   | (-8.63,3.01)  | 0.56                    | (0.06,1.04)  | 0.51                    | (0.06,0.97)  | 0.54                    | (-0.45,1.54)  | 0.26                    | (-0.75,1.26)  |
| P-value                           | 0.002                   |              | 0.01                    |               | 0.05                    |                | 0.18                    |               | 0.08                    |              | 0.14                    |              | 0.10                    |               | 0.13                    |               |
| P-trend                           | 0.0003                  |              | 0.002                   |               | 0.06                    |                | 0.32                    |               | 0.02                    |              | 0.03                    |              | 0.28                    |               | 0.62                    |               |
| <b>aMed *time</b>                 |                         |              |                         |               |                         |                |                         |               |                         |              |                         |              |                         |               |                         |               |
| tertile 2                         | -0.004                  | (-0.03,0.03) | -0.004                  | (-0.03,0.03)  | 0.49                    | (-0.37,1.35)   | 0.50                    | (-0.35,1.34)  | -0.04                   | (-0.11,0.03) | -0.03                   | (-0.08,0.02) | 0.002                   | (-0.15,0.15)  | -0.002                  | (-0.15,0.15)  |
| tertile 3                         | -0.03                   | (-0.06,0.01) | -0.03                   | (-0.06, 0.01) | 0.13                    | (-0.86,1.11)   | 0.06                    | (-0.90,1.03)  | -0.003                  | (-0.08,0.08) | -0.01                   | (-0.07,0.05) | 0.06                    | (-0.11,0.24)  | 0.07                    | (-0.11, 0.24) |
| P-value                           | 0.18                    |              | 0.20                    |               | 0.51                    |                | 0.46                    |               | 0.39                    |              | 0.55                    |              | 0.73                    |               | 0.69                    |               |
| P-trend                           | 0.11                    |              | 0.12                    |               | 0.71                    |                | 0.79                    |               | 0.82                    |              | 0.62                    |              | 0.48                    |               | 0.46                    |               |
| <b>AHEI-2010 score</b>            |                         |              |                         |               |                         |                |                         |               |                         |              |                         |              |                         |               |                         |               |
| tertile 2                         | 0.22                    | (0.0,0.40)   | 0.18                    | (-0.02,0.37)  | -4.33                   | (-9.70,1.04)   | -2.35                   | (-7.72,3.02)  | 0.64                    | (0.23,1.05)  | 0.46                    | (-0.01,0.92) | 0.60                    | (-0.30,1.52)  | 0.45                    | (-0.47,1.36)  |
| tertile 3                         | 0.18                    | (0.003,0.37) | 0.11                    | (-0.09,0.31)  | -3.06                   | (-8.45,2.33)   | -0.48                   | (-5.91,4.95)  | 0.55                    | (0.13,0.96)  | 0.40                    | (-0.05,0.86) | 0.21                    | (-0.71,1.20)  | -0.001                  | (-0.92,0.93)  |
| P-value                           | 0.04                    |              | 0.22                    |               | 0.27                    |                | 0.66                    |               | 0.01                    |              | 0.10                    |              | 0.41                    |               | 0.53                    |               |
| P-trend                           | 0.13                    |              | 0.17                    |               | 0.80                    |                | 0.85                    |               | 0.01                    |              | 0.09                    |              | 0.57                    |               | 0.98                    |               |
| <b>AHEI-2010 score*time</b>       |                         |              |                         |               |                         |                |                         |               |                         |              |                         |              |                         |               |                         |               |
| tertile 2                         | -0.01                   | (-0.03,0.02) | -0.02                   | (-0.04,0.02)  | -0.12                   | (-1.03,0.81)   | -0.19                   | (-1.10,0.71)  | -0.03                   | (-0.09,0.03) | 0.002                   | (-0.07,0.08) | 0.07                    | (-0.08,0.24)  | 0.08                    | (-0.08,0.24)  |
| tertile 3                         | -0.02                   | (-0.05,0.01) | -0.01                   | (-0.05,0.01)  | 0.27                    | (-0.65,1.18)   | 0.09                    | (-0.81,0.99)  | 0.02                    | (-0.04,0.08) | 0.05                    | (-0.03,0.12) | 0.06                    | (-0.109,0.22) | 0.07                    | (-0.09,0.23)  |
| P-value                           | 0.28                    |              | 0.22                    |               | 0.70                    |                | 0.81                    |               | 0.41                    |              | 0.36                    |              | 0.65                    |               | 0.57                    |               |
| P-trend                           | 0.13                    |              | 0.15                    |               | 0.83                    |                | 0.81                    |               | 0.38                    |              | 0.18                    |              | 0.62                    |               | 0.49                    |               |
| <b>Fortified cereals</b>          |                         |              |                         |               |                         |                |                         |               |                         |              |                         |              |                         |               |                         |               |
| tertile 2                         | 0.03                    | (-0.17,0.22) | 0.03                    | (-0.18,0.22)  | -0.34                   | (-5.72,5.03)   | 0.17                    | (-5.30,5.34)  | 0.16                    | (-0.29,0.61) | 0.16                    | (-0.30,0.61) | 0.75                    | (-0.15,1.66)  | 0.72                    | (-0.19,1.63)  |
| tertile 3                         | 0.15                    | (-0.05,0.35) | 0.13                    | (-0.07,0.33)  | -0.35                   | (-5.80,5.07)   | -0.16                   | (-5.90,5.54)  | -0.11                   | (-0.56,0.34) | -0.13                   | (-0.58,0.33) | -0.16                   | (-1.07,0.76)  | -0.17                   | (-1.10,0.73)  |
| P-value                           | 0.30                    |              | 0.36                    |               | 0.99                    |                | 0.99                    |               | 0.50                    |              | 0.51                    |              | 0.11                    |               | 0.12                    |               |
| P-trend                           | 0.08                    |              | 0.10                    |               | 0.89                    |                | 0.89                    |               | 0.66                    |              | 0.62                    |              | 0.61                    |               | 0.73                    |               |
| <b>Fortified cereals*time</b>     |                         |              |                         |               |                         |                |                         |               |                         |              |                         |              |                         |               |                         |               |
| tertile 2                         | -0.02                   | (-0.05,0.01) | -0.02                   | (-0.05,0.01)  | 0.85                    | (-0.07,1.77)   | 0.85                    | (-0.05,1.75)  | -0.03                   | (-0.10,0.05) | -0.03                   | (-0.10,0.05) | -0.06                   | (-0.23,0.10)  | -0.06                   | (-0.22,0.10)  |
| tertile 3                         | -0.01                   | (-0.04,0.03) | -0.01                   | (-0.04,0.02)  | 0.31                    | (-0.60,1.22)   | 0.35                    | (-0.54,1.24)  | 0.006                   | (-0.07,0.08) | 0.006                   | (-0.07,0.08) | 0.14                    | (-0.03,0.3)   | 0.13                    | (-0.03,0.29)  |
| P-value                           | 0.53                    |              | 0.55                    |               | 0.18                    |                | 0.18                    |               | 0.68                    |              | 0.68                    |              | 0.07                    |               | 0.09                    |               |
| P-trend                           | 0.72                    |              | 0.71                    |               | 0.63                    |                | 0.21                    |               | 0.90                    |              | 0.91                    |              | 0.07                    |               | 0.09                    |               |
| <b>Fruits and vegetables</b>      |                         |              |                         |               |                         |                |                         |               |                         |              |                         |              |                         |               |                         |               |
| tertile 2                         | 0.15                    | (-0.05,0.34) | 0.12                    | (-0.08,0.32)  | -5.92                   | (-12.30,-0.46) | -6.08                   | (-13.0,-0.43) | -0.11                   | (-0.56,0.34) | -0.14                   | (-0.59,0.31) | -0.65                   | (-1.56,0.26)  | -0.79                   | (-1.71,0.12)  |
| tertile 3                         | 0.15                    | (-0.05,0.35) | 0.09                    | (-0.11,0.30)  | 1.44                    | (-4.98,7.87)   | 1.04                    | (-5.37,6.83)  | 0.29                    | (-0.16,0.75) | 0.21                    | (-0.25,0.67) | -0.75                   | (-1.66,0.17)  | -1.00                   | (-2.01,0.01)  |
| P-value                           | 0.25                    |              | 0.48                    |               | 0.06                    |                | 0.06                    |               | 0.20                    |              | 0.30                    |              | 0.22                    |               | 0.10                    |               |
| P-trend                           | 0.13                    |              | 0.33                    |               | 0.62                    |                | 0.82                    |               | 0.30                    |              | 0.47                    |              | 0.14                    |               | 0.07                    |               |
| <b>Fruits and vegetables*time</b> |                         |              |                         |               |                         |                |                         |               |                         |              |                         |              |                         |               |                         |               |
| tertile 2                         | -0.01                   | (-0.03,0.03) | -0.002                  | (-0.03,0.03)  | 0.17                    | (-0.52,0.87)   | 0.20                    | (-0.49,0.68)  | -0.03                   | (-0.10,0.04) | -0.04                   | (-0.11,0.04) | -0.01                   | (-0.17,0.15)  | 0.004                   | (-0.15,0.16)  |
| tertile 3                         | -0.03                   | (-0.06,0.01) | -0.02                   | (-0.05,0.01)  | -0.06                   | (-0.78,0.67)   | 0.04                    | (-0.69,0.77)  | -0.02                   | (-0.09,0.06) | -0.01                   | (-0.09,0.06) | -0.05                   | (-0.21,0.12)  | -0.03                   | (-0.19,0.13)  |
| P-value                           | 0.24                    |              | 0.32                    |               | 0.80                    |                | 0.82                    |               | 0.68                    |              | 0.69                    |              | 0.81                    |               | 0.87                    |               |
| P-trend                           | 0.11                    |              | 0.16                    |               | 0.50                    |                | 0.87                    |               | 0.97                    |              | 0.94                    |              | 0.39                    |               | 0.87                    |               |

**Table S2. Cont.**

**Animal fat/ vit B12**

|           |      |              |      |              |       |               |       |               |      |              |      |              |      |              |      |              |
|-----------|------|--------------|------|--------------|-------|---------------|-------|---------------|------|--------------|------|--------------|------|--------------|------|--------------|
| tertile 2 | 0.05 | (-0.15,0.26) | 0.05 | (-0.16,0.25) | -5.44 | (-10.90,0.16) | -4.86 | (-10.26,0.53) | 0.26 | (-0.20,0.71) | 0.24 | (-0.21,0.70) | 0.20 | (-0.72,1.11) | 0.14 | (-0.78,1.05) |
| tertile 3 | 0.09 | (-0.11,0.29) | 0.12 | (-0.08,0.32) | -4.41 | (-9.84,0.99)  | -3.94 | (-9.32,1.43)  | 0.15 | (-0.30,0.61) | 0.18 | (-0.28,0.63) | 0.53 | (-0.38,1.45) | 0.46 | (-0.45,1.37) |
| P-value   | 0.67 |              | 0.50 |              | 0.12  |               | 0.17  |               | 0.54 |              | 0.56 |              | 0.51 |              | 0.59 |              |
| P-trend   | 0.21 |              | 0.26 |              | 0.11  |               | 0.15  |               | 0.35 |              | 0.30 |              | 0.28 |              | 0.35 |              |

**Animal fat/ vit B12\*time**

|           |       |              |       |              |      |              |      |              |       |              |       |              |       |              |       |              |
|-----------|-------|--------------|-------|--------------|------|--------------|------|--------------|-------|--------------|-------|--------------|-------|--------------|-------|--------------|
| tertile 2 | -0.01 | (-0.04,0.02) | -0.01 | (-0.04,0.02) | 0.64 | (-0.28,1.57) | 0.66 | (-0.25,1.57) | -0.07 | (-0.14,0.01) | -0.06 | (-0.14,0.01) | -0.11 | (-0.27,0.05) | -0.11 | (-0.27,0.05) |
| tertile 3 | 0.001 | (-0.03,0.03) | 0.001 | (-0.03,0.03) | 0.06 | (-0.86,0.99) | 0.04 | (-0.87,0.95) | -0.03 | (-0.10,0.05) | -0.03 | (-0.10,0.05) | -0.04 | (-0.20,0.13) | -0.03 | (-0.19,0.14) |
| P-value   | 0.60  |              | 0.72  |              | 0.30 |              | 0.26 |              | 0.54  |              | 0.23  |              | 0.39  |              | 0.37  |              |
| P-trend   | 0.99  |              | 0.95  |              | 0.89 |              | 0.95 |              | 0.33  |              | 0.35  |              | 0.88  |              | 0.98  |              |

**Dairy**

|           |       |              |       |              |       |              |       |              |       |              |       |              |        |              |       |              |
|-----------|-------|--------------|-------|--------------|-------|--------------|-------|--------------|-------|--------------|-------|--------------|--------|--------------|-------|--------------|
| tertile 2 | 0.08  | (-0.12,0.28) | 0.07  | (-0.13,0.26) | -1.36 | (-6.78,4.05) | -1.10 | (-6.49,4.29) | 0.36  | (-0.09,0.82) | 0.37  | (-0.09,0.83) | -0.41  | (-1.32,0.51) | -0.42 | (-1.33,0.50) |
| tertile 3 | -0.02 | (-0.22,0.17) | -0.34 | (-0.23,0.17) | 1.59  | (-3.79,6.97) | 1.89  | (-3.46,7.25) | -0.02 | (-0.48,0.43) | -0.06 | (-0.51,0.39) | -0.007 | (-0.92,0.91) | 0.001 | (-0.91,0.91) |
| P-value   | 0.59  |              | 0.62  |              | 0.56  |              | 0.54  |              | 0.18  |              | 0.13  |              | 0.61   |              | 0.60  |              |
| P-trend   | 0.71  |              | 0.67  |              | 0.63  |              | 0.53  |              | 0.90  |              | 0.77  |              | 0.96   |              | 0.90  |              |

**Dairy\*time**

|           |       |              |       |              |      |              |       |              |        |              |        |              |      |              |      |              |
|-----------|-------|--------------|-------|--------------|------|--------------|-------|--------------|--------|--------------|--------|--------------|------|--------------|------|--------------|
| tertile 2 | 0.001 | (-0.03,0.03) | 0.002 | (-0.03,0.03) | 0.29 | (-0.64,1.22) | 0.25  | (-0.65,1.16) | -0.03  | (-0.11,0.04) | -0.03  | (-0.10,0.05) | 0.03 | (-0.14,0.19) | 0.03 | (-0.13,0.19) |
| tertile 3 | 0.01  | (-0.02,0.04) | 0.008 | (-0.02,0.04) | 0.02 | (-0.90,0.94) | -0.04 | (-0.93,0.86) | -0.007 | (-0.08,0.07) | -0.005 | (-0.08,0.07) | 0.04 | (-0.13,0.20) | 0.03 | (-0.13,0.19) |
| P-value   | 0.83  |              | 0.84  |              | 0.80 |              | 0.54  |              | 0.68   |              | 0.69   |              | 0.91 |              | 0.92 |              |
| P-trend   | 0.53  |              | 0.52  |              | 0.97 |              | 0.89  |              | 0.86   |              | 0.91   |              | 0.72 |              | 0.70 |              |

**Plant PUFA/ vit E**

|           |       |              |       |              |       |                |       |               |      |              |      |              |      |              |      |              |
|-----------|-------|--------------|-------|--------------|-------|----------------|-------|---------------|------|--------------|------|--------------|------|--------------|------|--------------|
| tertile 2 | 0.007 | (-0.20,0.20) | -0.02 | (-0.22,0.18) | -3.90 | (-9.31,1.57)   | -3.22 | (-8.6,2.6)    | 0.45 | (-0.01,0.90) | 0.43 | (-0.02,0.88) | 0.55 | (-0.37,1.47) | 0.44 | (-0.48,1.35) |
| tertile 3 | 0.23  | (0.02,0.42)  | 0.22  | (0.02,0.42)  | -8.29 | (-13.70,-2.89) | -7.85 | (-13.2,-2.47) | 0.31 | (-0.15,0.76) | 0.29 | (-0.16,0.75) | 0.67 | (-0.25,1.59) | 0.63 | (-0.29,1.54) |
| P-value   | 0.04  |              | 0.03  |              | 0.01  |                | 0.02  |               | 0.15 |              | 0.17 |              | 0.31 |              | 0.39 |              |
| P-trend   | 0.01  |              | 0.01  |              | 0.003 |                | 0.005 |               | 0.17 |              | 0.19 |              | 0.15 |              | 0.19 |              |

**Plant PUFA/ vit E\*time**

|           |      |              |      |              |       |              |       |              |      |               |      |               |      |              |      |              |
|-----------|------|--------------|------|--------------|-------|--------------|-------|--------------|------|---------------|------|---------------|------|--------------|------|--------------|
| tertile 2 | 0.04 | (0.005,0.07) | 0.04 | (0.005,0.07) | -0.48 | (-1.40,0.45) | -0.47 | (-1.39,0.43) | 0.07 | (-0.005,0.14) | 0.07 | (-0.003,0.14) | 0.17 | (0.01,0.34)  | 0.17 | (0.01,0.33)  |
| tertile 3 | 0.03 | (-0.01,0.06) | 0.02 | (-0.01,0.05) | -0.59 | (-1.49,0.32) | -0.50 | (-1.39,0.39) | 0.06 | (-0.01,0.14)  | 0.07 | (-0.01,0.14)  | 0.14 | (-0.02,0.30) | 0.13 | (-0.03,0.29) |
| P-value   | 0.07 |              | 0.07 |              | 0.42  |              | 0.48  |              | 0.12 |               | 0.11 |               | 0.10 |              | 0.10 |              |
| P-trend   | 0.21 |              | 0.22 |              | 0.20  |              | 0.27  |              | 0.09 |               | 0.08 |               | 0.13 |              | 0.14 |              |

**Sugar/ low protein**

|           |       |               |       |               |      |              |      |              |       |               |       |               |       |              |       |              |
|-----------|-------|---------------|-------|---------------|------|--------------|------|--------------|-------|---------------|-------|---------------|-------|--------------|-------|--------------|
| tertile 2 | -0.04 | (-0.24,0.16)  | -0.03 | (-0.23,0.17)  | 2.13 | (-3.25,7.51) | 1.34 | (-4.02,6.71) | 0.04  | (-0.41,0.49)  | 0.05  | (-0.40,0.50)  | -0.07 | (-0.99,0.84) | -0.04 | (-0.95,0.88) |
| tertile 3 | -0.30 | (-0.50,-0.10) | -0.29 | (-0.49,-0.09) | 6.94 | (1.47,12.41) | 6.22 | (0.76,11.68) | -0.60 | (-1.05,-0.13) | -0.57 | (-1.03,-0.11) | -0.88 | (-1.81,0.05) | -0.89 | (-1.81,0.04) |
| P-value   | 0.007 |               | 0.008 |               | 0.04 |              | 0.06 |              | 0.01  |               | 0.01  |               | 0.11  |              | 0.10  |              |
| P-trend   | 0.007 |               | 0.01  |               | 0.01 |              | 0.03 |              | 0.03  |               | 0.04  |               | 0.06  |              | 0.06  |              |

**Sugar/ low protein\*time**

|           |       |              |       |              |      |              |      |              |       |              |        |              |        |              |       |              |
|-----------|-------|--------------|-------|--------------|------|--------------|------|--------------|-------|--------------|--------|--------------|--------|--------------|-------|--------------|
| tertile 2 | -0.01 | (-0.05,0.02) | -0.02 | (-0.05,0.01) | 0.03 | (-0.85,0.92) | 0.05 | (-0.83,0.92) | 0.004 | (-0.07,0.08) | -0.001 | (-0.07,0.07) | 0.02   | (-0.13,0.18) | 0.02  | (-0.13,0.18) |
| tertile 3 | 0.006 | (-0.03,0.04) | 0.007 | (-0.02,0.04) | 0.10 | (-0.82,1.02) | 0.06 | (-0.84,0.97) | 0.008 | (-0.07,0.08) | 0.004  | (-0.07,0.08) | -0.007 | (-0.17,0.16) | 0.001 | (-0.16,0.16) |
| P-value   | 0.42  |              | 0.37  |              | 0.98 |              | 0.98 |              | 0.98  |              | 0.99   |              | 0.93   |              | 0.95  |              |
| P-trend   | 0.81  |              | 0.78  |              | 0.84 |              | 0.92 |              | 0.96  |              | 0.96   |              | 0.78   |              | 0.72  |              |

<sup>a</sup>Base model includes time, time squared, baseline age, sex, education, energy intake, and retest effects.

<sup>b</sup>Full model includes base model variables plus smoking, exercise, and alcohol consumption.

aMed= alternate Mediterranean diet score, AHEI= alternate healthy eating index; Vit = vitamin; PUFA = polyunsaturated fatty acid.
